# Supplementary material for: Better organized care via care pathways: A multicenter study
Source: PLOS journal article supplement (doi:10.1371/journal.pone.0180398), 2017-07-03
Supplement: S1 (10.1371/journal.pone.0180398.s001) [file journal.pone.0180398.s001]

## S1 Table

How do you agree with the following statements?

Strongly disagree(1)

Strongly agree(10)

| Patient focused organization             |                                                                                                                        | 1 | 2 | 3 | 4 | 5 | 6 | 7 | 8 | 9 | 10 |
|------------------------------------------|------------------------------------------------------------------------------------------------------------------------|---|---|---|---|---|---|---|---|---|----|
| PO1                                      | A patient focused vision exists within the organization.                                                               |   |   |   |   |   |   |   |   |   |    |
| PO2                                      | Quality of care is the priority within the organization.                                                               |   |   |   |   |   |   |   |   |   |    |
| PO3                                      | The care process coordinator has a patient focused vision.                                                             |   |   |   |   |   |   |   |   |   |    |
| PO4                                      | Patient communication is considered to be important within the organization.                                           |   |   |   |   |   |   |   |   |   |    |
| PO5                                      | The organizational structure is patient focused.                                                                       |   |   |   |   |   |   |   |   |   |    |
| PO6                                      | There is a clear vision of policy regarding care throughout the entire hospital.                                       |   |   |   |   |   |   |   |   |   |    |
| Coordination of the care process.        |                                                                                                                        | 1 | 2 | 3 | 4 | 5 | 6 | 7 | 8 | 9 | 10 |
| COR1                                     | Agreements are observed.                                                                                               |   |   |   |   |   |   |   |   |   |    |
| COR2                                     | All team members are familiar with the various steps in the care process.                                              |   |   |   |   |   |   |   |   |   |    |
| COR3                                     | There is an optimum timing of activities within the care process.                                                      |   |   |   |   |   |   |   |   |   |    |
| COR4                                     | Concrete agreements are made within the care process.                                                                  |   |   |   |   |   |   |   |   |   |    |
| COR5                                     | Team members consider themselves to be engaged in the organization of the care process.                                |   |   |   |   |   |   |   |   |   |    |
| COR6                                     | Patients/family are provided with candid (frank, open; straightforward) information regarding their health.            |   |   |   |   |   |   |   |   |   |    |
| COR7                                     | Discharge is communicated in a timely manner to the patient and family so that they can take necessary measures.       |   |   |   |   |   |   |   |   |   |    |
| Communication with patient and family    |                                                                                                                        | 1 | 2 | 3 | 4 | 5 | 6 | 7 | 8 | 9 | 10 |
| COM1                                     | Within the care process time is explicitly provided to listen to the patient and his family.                           |   |   |   |   |   |   |   |   |   |    |
| COM2                                     | Time is explicitly scheduled within the care process for communications between healthcare professional and patient.   |   |   |   |   |   |   |   |   |   |    |
| COM3                                     | Within the care process there is provision for sufficient time to provide information.                                 |   |   |   |   |   |   |   |   |   |    |
| COM4                                     | The patient is explicitly asked for his consent with regard to the proposed care.                                      |   |   |   |   |   |   |   |   |   |    |
| Collaboration with primary care.         |                                                                                                                        | 1 | 2 | 3 | 4 | 5 | 6 | 7 | 8 | 9 | 10 |
| SE1                                      | Primary care is considered by the hospital to be an equal partner.                                                     |   |   |   |   |   |   |   |   |   |    |
| SE2                                      | Good cooperation exists between the hospital and primary care.                                                         |   |   |   |   |   |   |   |   |   |    |
| SE3                                      | In complex care situations consultation takes place between the physician/surgeon and general practitioner.            |   |   |   |   |   |   |   |   |   |    |
| Monitoring and follow-up of care process |                                                                                                                        | 1 | 2 | 3 | 4 | 5 | 6 | 7 | 8 | 9 | 10 |
| OP1                                      | When (re)designing the care process quality indicators are formulated.                                                 |   |   |   |   |   |   |   |   |   |    |
| OP2                                      | Whether the care provided is tailored to the patient's needs is systematically monitored/followed-up.                  |   |   |   |   |   |   |   |   |   |    |
| OP3                                      | Within the care process patient satisfaction is monitored/followed-up systematically.                                  |   |   |   |   |   |   |   |   |   |    |
| OP4                                      | The goals of the care process are described explicitly.                                                                |   |   |   |   |   |   |   |   |   |    |
| OP5                                      | Within the care process monitoring/follow-up is performed to verify whether planned activities are actually performed. |   |   |   |   |   |   |   |   |   |    |
| OP6                                      | Outcomes are systematically monitored/followed-up.                                                                     |   |   |   |   |   |   |   |   |   |    |
| OP7                                      | Variances can be monitored within the care process.                                                                    |   |   |   |   |   |   |   |   |   |    |
| OP8                                      | Within the care process risks of complications are monitored / followed-up systematically.                             |   |   |   |   |   |   |   |   |   |    |
| OP9                                      | The progress in the care process is continuously monitored/followed-up and adjusted.                                   |   |   |   |   |   |   |   |   |   |    |
